# Supplementary material
Source: Royal Society of Chemistry journal article supplement (doi:10.1039/d5su00936g)
Supplement: d5su00936g2.xlsx [file d5su00936g2.xlsx]

## Sheet: GDP calculation
							year	GDP(Trillion US$)	Ammonia
							2010	1.67562	12.66
							2011	1.82305	13.08
							2012	1.82764	13.18
							2013	1.85672	13.54
							2014	2.03913	13.63
							2015	2.10359	13.55
							2016	2.2948	14.68
							2017	2.65147	14.52
							2018	2.70293	14.41
							2019	2.83155	14.34
							2020	2.66769	17.9
							2021	3.1763	18.8
							2022	3.2476	19.5
							2023	3.3784
							2024	3.5092
							2025	3.64
							2026	3.7708
							2027	3.9016
							2028	4.0324
							2029	4.1632
							2030	4.294
							2031	4.4248
							2032	4.5556
							2033	4.6864
							2034	4.8172
							2035	4.948
							2036	5.0788
							2037	5.2096
							2038	5.3404
							2039	5.4712
							2040	5.602
							2041	5.7328
							2042	5.8636
							2043	5.9944
							2044	6.1252
							2045	6.256
							2046	6.3868
							2047	6.5176
							2048	6.6484
							2049	6.7792
							2050	6.91
							2051	7.0408
							2052	7.1716
							2053	7.3024
							2054	7.4332
							2055	7.564
							2056	7.6948
							2057	7.8256
							2058	7.9564
							2059	8.0872
							2060	8.218
							2061	8.3488
							2062	8.4796
							2063	8.6104
							2064	8.7412
							2065	8.872
							2066	9.0028
							2067	9.1336
							2068	9.2644
							2069	9.3952
							2070	9.526

## Sheet: GDP vs Production
								YEAR	GDP(Trillion US$)	Ammonia
								2010	1.67562	12.66
								2011	1.82305	13.08												YEAR	GDP(Trillion US$)	Ammonia	CO2	CO2 AWE	CO2
								2012	1.82764	13.18												2010	1.67562	12.66	65.5788	65.5788	65.5788
								2013	1.85672	13.54												2020	2.9	14.67	75.9906	75.9906	75.9906
								2014	2.03913	13.63												2030	6.2	20.59	106.656	113.863	106.656
								2015	2.10359	13.55												2040	14.8	28.63	148.303	158.324	148.303
								2016	2.2948	14.68												2050	35.1	39.81	206.216	220.149	206.216
								2017	2.65147	14.52												2060	42.6	55.95	289.821	309.404	289.821
								2018	2.70293	14.41												2070	51.4	76.96	398.653	425.589	230.88
								2019	2.83155	14.34
								2020	2.9	14.67
								2021	3.15	14.76											YEAR	GDP(Trillion US$)	Ammonia	CO2	CO2 with CCUS	CO2 AWE	CO2	red
								2022	3.385	15.82											2010	1.67562	12.66	65.5788	65.5788	65.5788	65.5788	65.5788
								2023	3.75	16.35											2020	2.9	14.67	75.9906	75.9906	75.9906	75.9906	75.9906
								2030	6.2	21											2030	6.2	20.59	106.656	78.242	113.863	106.656	61.77
								2040	14.8	29											2040	14.8	28.63	148.303	108.794	158.324	148.303	75.8695
								2050	35.1	40											2050	35.1	39.81	206.216	151.278	220.149	206.216	88.7763
								2060	42.6	55											2060	42.6	55.95	289.821	212.61	309.404	289.821	96.7935
								2070	51.4	77											2070	51.4	76.96	398.653	292.448	425.589	230.88	53.872
				5.9944
				6.1252
				6.256
				6.3868
				6.5176
				6.6484
				6.7792
				6.91
				7.0408
				7.1716
				7.3024
				7.4332
				7.564
				7.6948
				7.8256
				7.9564
				8.0872
				8.218
				8.3488
				8.4796
				8.6104
				8.7412
				8.872
				9.0028
				9.1336
				9.2644
				9.3952
				9.526

## Sheet: Annual and Decadal CO2 emission
Annual and Decadal CO₂ Emissions (2020-2070)
All values in MMT CO₂/yr (annual) or MMT CO₂ (cumulative/decadal). Emission factors: BAU-SMR = 7.02; BAU-SMR+ATR = 7.55; SMR/Air = 7.57 CO₂ eq. tons/ton NH₃.
PART A Annual Time Series (2020-2070)
Year	Ammonia Production (MMT NH₃/yr)	BAU-SMR Annual (MMT CO₂/yr)	BAU-SMR Running Cumulative (MMT CO₂)	BAU-SMR+ATR Annual (MMT CO₂/yr)	BAU-SMR+ATR Running Cumulative (MMT CO₂)	SMR/Air Annual (MMT CO₂/yr)	SMR/Air Running Cumulative (MMT CO₂)	Decade
2020	14.67	102.983	102.98	110.758	110.76	111.052	111.05	2020-2029
2021	14.76	103.615	206.6	111.438	222.2	111.733	222.79	2020-2029
2022	15.82	111.056	317.65	119.441	341.64	119.757	342.54	2020-2029
2023	16.35	114.777	432.43	123.442	465.08	123.769	466.31	2020-2029
2024	16.9	118.638	551.07	127.595	592.68	127.933	594.25	2020-2029
2025	17.47	122.639	673.71	131.899	724.57	132.248	726.49	2020-2029
2026	18.05	126.711	800.42	136.278	860.85	136.638	863.13	2020-2029
2027	18.66	130.993	931.41	140.883	1001.73	141.256	1004.39	2020-2029
2028	19.28	135.346	1066.76	145.564	1147.3	145.95	1150.34	2020-2029
2029	19.93	139.909	1206.67	150.471	1297.77	150.87	1301.21	2020-2029
2030	20.59	144.542	1351.21	155.454	1453.22	155.866	1457.07	2030-2039
2031	21.28	149.386	1500.6	160.664	1613.89	161.09	1618.16	2030-2039
2032	22	154.44	1655.04	166.1	1779.99	166.54	1784.7	2030-2039
2033	22.73	159.565	1814.6	171.612	1951.6	172.066	1956.77	2030-2039
2034	23.5	164.97	1979.57	177.425	2129.02	177.895	2134.66	2030-2039
2035	24.28	170.446	2150.02	183.314	2312.34	183.8	2318.46	2030-2039
2036	25.1	176.202	2326.22	189.505	2501.84	190.007	2508.47	2030-2039
2037	25.94	182.099	2508.32	195.847	2697.69	196.366	2704.84	2030-2039
2038	26.81	188.206	2696.52	202.416	2900.11	202.952	2907.79	2030-2039
2039	27.71	194.524	2891.05	209.21	3109.32	209.765	3117.55	2030-2039
2040	28.63	200.983	3092.03	216.156	3325.47	216.729	3334.28	2040-2049
2041	29.59	207.722	3299.75	223.405	3548.88	223.996	3558.28	2040-2049
2042	30.58	214.672	3514.42	230.879	3779.76	231.491	3789.77	2040-2049
2043	31.61	221.902	3736.32	238.655	4018.41	239.288	4029.06	2040-2049
2044	32.67	229.343	3965.67	246.659	4265.07	247.312	4276.37	2040-2049
2045	33.76	236.995	4202.66	254.888	4519.96	255.563	4531.93	2040-2049
2046	34.89	244.928	4447.59	263.42	4783.38	264.117	4796.05	2040-2049
2047	36.06	253.141	4700.73	272.253	5055.63	272.974	5069.02	2040-2049
2048	37.27	261.635	4962.37	281.389	5337.02	282.134	5351.16	2040-2049
2049	38.52	270.41	5232.78	290.826	5627.85	291.596	5642.75	2040-2049
2050	39.81	279.466	5512.24	300.565	5928.41	301.362	5944.12	2050-2059
2051	41.14	288.803	5801.05	310.607	6239.02	311.43	6255.55	2050-2059
2052	42.52	298.49	6099.54	321.026	6560.04	321.876	6577.42	2050-2059
2053	43.95	308.529	6408.07	331.822	6891.87	332.702	6910.12	2050-2059
2054	45.42	318.848	6726.91	342.921	7234.79	343.829	7253.95	2050-2059
2055	46.94	329.519	7056.43	354.397	7589.18	355.336	7609.29	2050-2059
2056	48.51	340.54	7396.97	366.25	7955.44	367.221	7976.51	2050-2059
2057	50.14	351.983	7748.96	378.557	8333.99	379.56	8356.07	2050-2059
2058	51.82	363.776	8112.73	391.241	8725.23	392.277	8748.35	2050-2059
2059	53.56	375.991	8488.72	404.378	9129.61	405.449	9153.8	2050-2059
2060	55.35	388.557	8877.28	417.892	9547.5	419	9572.79	2060-2070
2061	57.2	401.544	9278.83	431.86	9979.36	433.004	10005.8	2060-2070
2062	59.12	415.022	9693.85	446.356	10425.7	447.538	10453.3	2060-2070
2063	61.1	428.922	10122.8	461.305	10887	462.527	10915.9	2060-2070
2064	63.15	443.313	10566.1	476.783	11363.8	478.046	11393.9	2060-2070
2065	65.27	458.195	11024.3	492.788	11856.6	494.094	11888	2060-2070
2066	67.45	473.499	11497.8	509.248	12365.8	510.596	12398.6	2060-2070
2067	69.71	489.364	11987.1	526.311	12892.1	527.705	12926.3	2060-2070
2068	72.05	505.791	12492.9	543.977	13436.1	545.418	13471.7	2060-2070
2069	74.46	522.709	13015.6	562.173	13998.3	563.662	14035.4	2060-2070
2070	76.96	540.259	13555.9	581.048	14579.4	582.587	14618	2060-2070
PART B Decadal Aggregate Emissions (sum of annual values within each decade; years inclusive)
Decade	Start Year	End Year	N Years	BAU-SMR Decadal Sum (MMT CO₂)	BAU-SMR+ATR Decadal Sum (MMT CO₂)	SMR/Air Decadal Sum (MMTCO₂)
2020-2029	2020	2029	10	1206.67	1297.77	1301.21
2030-2039	2030	2039	10	1684.38	1811.55	1816.35
2040-2049	2040	2049	10	2341.73	2518.53	2525.2
2050-2059	2050	2059	10	3255.95	3501.77	3511.04
2060-2070	2060	2070	11	5067.18	5449.74	5464.18
2020-2070 Total	2020	2070	51	13555.9	14579.4	14618
PART C Running Cumulative Emissions at End of Each Decade (sum of all annual values from 2020 to year shown, inclusive)
To Year (inclusive)	BAU-SMR Cumulative (MMT CO₂)	BAU-SMR+ATR Cumulative (MMT CO₂)	SMR/Air Cumulative (MMT CO₂)
End of 2020s (2020-2029)	1206.67	1297.77	1301.21
End of 2030s (2020-2039)	2891.05	3109.32	3117.55
End of 2040s (2020-2049)	5232.78	5627.85	5642.75
End of 2050s (2020-2059)	8488.72	9129.61	9153.8
End of 2060s (2020-2070)	13555.9	14579.4	14618
Notes on Aggregation Convention:
1. Annual values (Part A) are the primary data. All aggregates in Parts B and C are derived directly from these annual values.
2. Decadal sums (Part B) use inclusive year ranges: 2020-2029 = 10 years; 2030-2039 = 10 years; 2040-2049 = 10 years; 2050-2059 = 10 years; 2060-2070 = 11 years.
3. Running cumulative (Parts A & C) = sum of all annual emissions from 2020 to the year shown (inclusive), computed as a true running total.
4. Emission factors applied: BAU-SMR = 7.02; BAU-SMR+ATR = 7.55; SMR/Air = 7.57 CO₂ eq. tons/ton NH₃ produced.

## Sheet: CO2 calculation
					year	Ammonia	SMR CO2	SMR+ATR CO2	SMR/Air CO2		Cumulative CO2	Cumulative BAU SMR+ATR	Cumulative SMR/Air
					2010	12.66	88.8732	95.583	95.8362
					2011	13.08	91.8216	98.754	99.0156
					2012	13.18	92.5236	99.509	99.7726
					2013	13.54	95.0508	102.227	102.498
					2014	13.63	95.6826	102.907	103.179
					2015	13.55	95.121	102.303	102.574
					2016	14.68	103.054	110.834	111.128
					2017	14.52	101.93	109.626	109.916
					2018	14.41	101.158	108.796	109.084
					2019	14.34	100.667	108.267	108.554
					2020	14.67	102.983	110.758	111.052	101.516
					2021	14.76	103.615	111.438	111.733
					2022	15.82	111.056	119.441	119.757
					2023	16.35	114.777	123.443	123.77
					2024	16.9	118.638	127.595	127.933
					2025	17.47	122.639	131.898	132.248
					2026	18.05	126.711	136.278	136.639
					2027	18.66	130.993	140.883	141.256
					2028	19.28	135.346	145.564	145.95
					2029	19.93	139.909	150.471	150.87		1206.67	1297.77	1301.21
					2030	20.59	144.542	155.454	155.866	137.953	1351.21	1453.22	1457.07
					2031	21.28	149.386	160.664	161.09
					2032	22	154.44	166.1	166.54
					2033	22.73	159.565	171.612	172.066
					2034	23.5	164.97	177.425	177.895
					2035	24.28	170.446	183.314	183.8
					2036	25.1	176.202	189.505	190.007
					2037	25.94	182.099	195.847	196.366
					2038	26.81	188.206	202.415	202.952
					2039	27.71	194.524	209.21	209.765		2891.05	3109.32	3117.55
					2040	28.63	200.983	216.156	216.729	186.095	3092.03	3325.47	3334.28
					2041	29.59	207.722	223.404	223.996
					2042	30.58	214.672	230.879	231.491
					2043	31.61	221.902	238.655	239.288
					2044	32.67	229.343	246.659	247.312
					2045	33.76	236.995	254.888	255.563
					2046	34.89	244.928	263.419	264.117
					2047	36.06	253.141	272.253	272.974
					2048	37.27	261.635	281.389	282.134
					2049	38.52	270.41	290.826	291.596		5232.78	5627.85	5642.75
					2050	39.81	279.466	300.565	301.362	255.58	5512.24	5928.41	5944.12
					2051	41.14	288.803	310.607	311.43
					2052	42.52	298.49	321.026	321.876
					2053	43.95	308.529	331.822	332.702
					2054	45.42	318.848	342.921	343.829
					2055	46.94	329.519	354.397	355.336
					2056	48.51	340.54	366.25	367.221
					2057	50.14	351.983	378.557	379.56
					2058	51.82	363.776	391.241	392.277
					2059	53.56	375.991	404.378	405.449		8488.72	9129.61	9153.8
					2060	55.35	388.557	417.892	419	348.705	8877.28	9547.5	9572.79
					2061	57.2	401.544	431.86	433.004
					2062	59.12	415.022	446.356	447.538
					2063	61.1	428.922	461.305	462.527
					2064	63.15	443.313	476.782	478.046
					2065	65.27	458.195	492.788	494.094
					2066	67.45	473.499	509.248	510.597
					2067	69.71	489.364	526.31	527.705
					2068	72.05	505.791	543.977	545.418
					2069	74.46	522.709	562.173	563.662		13015.6	13998.3	14035.4
					2070	76.96	540.259	581.048	582.587	477.152	13555.9	14579.4	14618
							13555.9	14579.4	14618

## Sheet: Technology Intervention
						SMR CC+RE 2070	AWE CC+ RE 2070	MP CC+RE 2070	Environment impact in AS
				Impact category	Unit	Total	Total	Total	Total
				Carcinogens	kg C2H3Cl eq	17.1859	8.00901	7.1421	10.5887
				Non-carcinogens	kg C2H3Cl eq	74.6532	35.0876	53.6071	50.6612
				Respiratory inorganics	kg PM2.5 eq	1.2301	0.569743	-0.184645	0.616972
				Ionizing radiation	Bq C-14 eq	2259.76	1062.81	1452.95	1499.92
				Ozone layer depletion	kg CFC-11 eq	8.34406e-05	3.7551e-05	2.03627e-05	4.78803e-05
				Respiratory organics	kg C2H4 eq	1.36449	0.578837	-1.79799	0.339169
				Aquatic ecotoxicity	kg TEG water	40868	19210	7333.12	23332
				Terrestrial ecotoxicity	kg TEG soil	20209.6	9551.25	12364.6	13311.4
				Terrestrial acid/nutri	kg SO2 eq	18.8566	8.57571	1.09441	10.1637
				Land occupation	m2org.arable	14.4976	6.97996	5.73261	8.98577
				Aquatic acidification	kg SO2 eq	5.3018	2.45201	0.0034443	2.81723
				Aquatic eutrophication	kg PO4 P-lim	0.176159	0.083306	0.0942126	0.113343
				Global warming	kg CO2 eq	1547.76	653.931	-247.842	741.724
				Non-renewable energy	MJ primary	26813.2	11366.3	-34036.6	6919.78
				Mineral extraction	MJ surplus	160.214	81.4743	133.977	115.597
